# Supplementary material for: Modelling subject-specific childhood growth using linear mixed-effect models with cubic regression splines
Source: PubMed Central journal article supplement (PMC4705630; doi:10.1186/s12982-015-0038-3), 2016-01-07

# Child\_growth\_splines

*Ciprian M Crainiceanu*

*Tuesday, July 21, 2015*

This document provides the basic R code for building linear mixed effects models of various complexities for child growth data. We are focusing on models of the type

$$Y_i(t_{ij}) = X_i\gamma + \sum_{l=1}^p (\beta_l + \beta_{il})t_{ij}^l + \sum_{k=1}^K b_k(t_{ij} - \kappa_k)_+^p + \epsilon_{ij},$$

where  $X_i$  are covariates (e.g. sex),  $(\beta_{i1}, \dots, \beta_{ip})^t$  is a  $p$ -variate normal vector of mean zero random effects with a  $p \times p$  unstructured covariance matrix  $\Sigma$ ,  $\kappa_1, \dots, \kappa_K$  are the knots used for the splines, and  $p$  is the degree of the spline. In our context we use  $p = 1$  for linear splines and  $p = 3$  for cubic splines as well as  $K = 3$  ( $\kappa_1 = 3, \kappa_2 = 10, \kappa_3 = 29$ ) as used in the paper by Howe et al., 2013 and  $K = 5$  ( $\kappa_1 = 3, \kappa_2 = 6, \kappa_3 = 18, \kappa_4 = 24, \text{ and } \kappa_5 = 40$ ). Note that the first derivative (growth velocity) can be estimated from the model as

$$p \sum_{l=1}^p (\beta_l + \beta_{il})t_{ij}^{l-1} + p \sum_{k=1}^K b_k(t_{ij} - \kappa_k)_+^{p-1},$$

which is a piece-wise constant function if  $p = 1$  (linear spline) and is a continuous smooth function for  $p = 3$  (cubic spline).

We start by setting up the data and labels in R.

Set up the working directory (we chose a working directory that contains the dataset)

```
setwd("D:/collaborators/OTHERS/Andrada_Ivanescu/lme_resubmission/data_and_software")
```

Upload the necessary libraries (lme4 and nlme are essential)

```
## necessary libraries:  
library(nlme)  
library(foreign)  
library(ggplot2)  
library(lme4)
```

```
## Loading required package: Matrix  
##  
## Attaching package: 'lme4'  
##  
## The following object is masked from 'package:nlme':  
##  
##      lmList
```

Read in the data, check the variable names, and attach the data. Data are contained in the file named "Complete database.dta"

```
file.dta = read.dta("Complete database.dta")  
names(file.dta)
```

```
## [1] "codigo"      "fechaentr"   "fechanac"   "height"     "edaddias"
## [6] "edadmes"     "gender"      "weight"     "BMI"        "waz"
## [11] "haz"         "baz"         "whz"        "fwasting"   "fstunting"
## [16] "funweight"   "fBMIag"     "heightbr"   "weightbr"   "px"
## [21] "ma0fe1"     "ltxht"      "educmat"    "cgeocasa"   "tipocasa"
## [26] "almagua"    "elimexcret" "tierefrig"  "tiedvdvhs"  "tieminest"
## [31] "tietelef"   "tiecompu"   "tiecarro"   "inmensfam"  "gastmagua"
## [36] "gastmluz"   "gastmcom"   "lost"       "baseline"   "atierefrig"
## [41] "atiedvdvhs" "atieminest" "atietelef"  "atiecompu"  "atiecarro"
## [46] "assets"     "gastos"     "salmagua"   "selimexcret" "aguasani"
## [51] "peso_rn"    "talla_rn"   "talla_ma"   "difheightbr" "Aheight"
## [56] "Aweight"
```

```
attach(file.dta)
```

Define the unique ids (subjects). The function `unique` in R ignores the repetition of the same id and keeps only the unique ids. `n` stores the number of subjects

```
ui<-unique(file.dta[, "codigo"])
n=length(ui)
```

Transform the id codes stored in `codigo` into a number between 1 and `n=215`. `id.num` has a length of 10838, which is the total number of growth measurements for the 215 children (average of 50.4 observations per child)

```
file.dta$id.num<-as.numeric(as.factor(file.dta$codigo))
id.num<-as.numeric(as.factor(file.dta$codigo))
length(id.num)
```

```
## [1] 10838
```

Build the necessary ingredients for the linear mixed effects model using a truncated cubic spline approach 5 knots at  $\kappa_1 = 3$ ,  $\kappa_2 = 6$ ,  $\kappa_3 = 18$ ,  $\kappa_4 = 24$ , and  $\kappa_5 = 40$ . Start by building the linear, quadratic, and cubic monomials of age

```
t = edadmes
t2 = t^2
t3 = t^3
```

Build the truncated cubic splines

```
t3.3=(t-3)^3*I(t>3)
t3.6=(t-6)^3*I(t>6)
t3.18=(t-18)^3*I(t>18)
t3.24=(t-24)^3*I(t>24)
t3.40=(t-40)^3*I(t>40)
```

Fitting an OLS (no mixed effects) truncated cubic splines (this model does not allow for subject-specific random effects,  $\beta_{il}$ ). This model is not appropriate for subject-specific fitting, but can be used for estimation of population-level parameters. Below, the variable `ma0fe1` is the sex variable that encodes male as 0 and female as 1.

```
fit.lme.CUB.ols.5 = lm(height ~ factor(ma0fe1) + I(t>24) + t+ t2 + t3 +
                        t3.3 + t3.6 + t3.18+t3.24+t3.40)
```

Obtain and display AIC and BIC for this model

```
AIC(fit.lme.CUB.ols.5)
```

```
## [1] 52397.75
```

```
BIC(fit.lme.CUB.ols.5)
```

```
## [1] 52485.24
```

Fitting a linear mixed effects model where we allow for random intercept and random slopes (the quadratic and cubic terms do not have random effects) with truncated cubic splines

```
fit.lme.CUB.5 = lme(height ~ factor(ma0fe1) + I(t>24) + t+ t2 + t3 +
                    t3.3 + t3.6 + t3.18+t3.24+t3.40,
                    random= ~1+t|id.num,method='REML')
```

Obtain and display AIC and BIC for this model

```
AIC(fit.lme.CUB.5)
```

```
## [1] 27541.87
```

```
BIC(fit.lme.CUB.5)
```

```
## [1] 27651.22
```

Fit the same model, but accounting for AR(1) correlation of residuals

```
fit.lme.CUB.ar.5 = lme(height ~ factor(ma0fe1) + I(t>24) + t+ t2 + t3 +
                        t3.3 + t3.6 + t3.18 + t3.24 + t3.40,
                        random= ~1+t|id.num,
                        correlation=corCAR1(form=~t|id.num),method='REML')
```

Obtain and display AIC and BIC for this model

```
AIC(fit.lme.CUB.ar.5)
```

```
## [1] 19235.37
```

```
BIC(fit.lme.CUB.ar.5)
```

```
## [1] 19352
```

We would also like to plot the data for a couple of subjects together with their corresponding fits. We will focus on subject 1 and subject 150.

```
su=1
plot(t[id.num==su],height[id.num==su],xlab="Time (months)",ylab="Height (cms)",pch=20)
lines(t[id.num==su],fit.lme.CUB.5$fitted[id.num==su,2],col="blue",lwd=3)
```

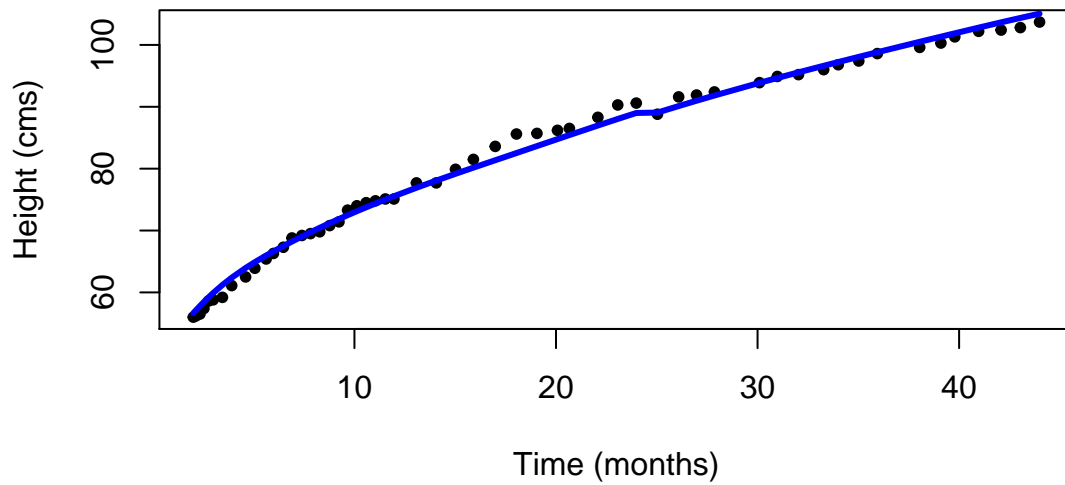

Do the same thing for subject 150

```
su=150
plot(t[id.num==su],height[id.num==su],xlab="Time (months)",ylab="Height (cms)",pch=20)
lines(t[id.num==su],fit.lme.CUB.5$fitted[id.num==su,2],col="blue",lwd=3)
```

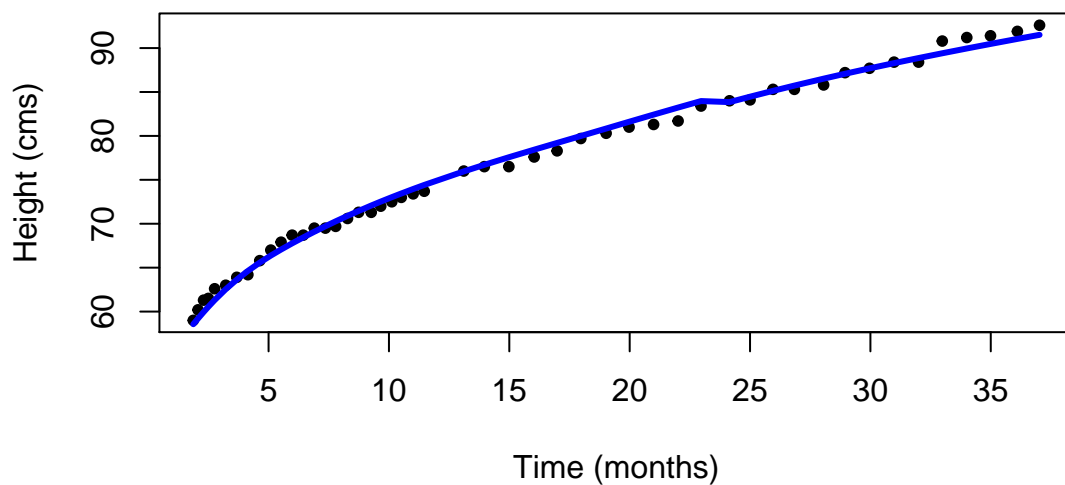

Supplement: 12982_2015_38_MOESM1_ESM.pdf [file 12982_2015_38_MOESM1_ESM.pdf]
